# Supplementary material for: Functional Characterization of Muscarinic Receptors in Human Schwann Cells
Source: PubMed Central journal article supplement (PMC7555815; doi:10.3390/ijms21186666), 2020-09-11
Supplement: ijms-21-06666-s001.pdf [file ijms-21-06666-s001.pdf]

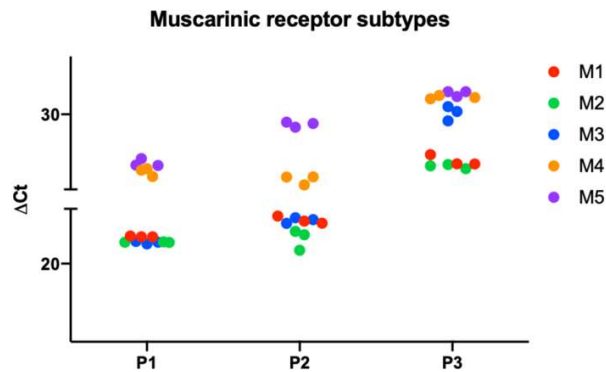

**Figure S1.** qRT-PCR analysis for muscarinic receptor subtypes. The graph reported the triplicate of the  $\Delta Ct$  for each muscarinic receptor subtypes in three different patients. The most express subtypes are M1 and M2 for each patient whereas M4 and M5 present a lowest expression; M3 appears more variable.

**Table S1.** Statistical analysis of MTS assay after APE and muscarine treatment at the final concentration of 100  $\mu M$ .

| <i>Tukey's multiple comparisons test</i> | <i>Summary</i> | <i>Adjusted P Value</i> |
|------------------------------------------|----------------|-------------------------|
| Ctrl 3DIV vs. APE 3DIV                   | ****           | <0.0001                 |
| Ctrl 3DIV vs. Muscarine 3DIV             | ***            | 0.0001                  |
| Ctrl 3DIV vs. Ctrl 5DIV                  | **             | 0.0065                  |
| Ctrl 3DIV vs. Ctrl 7DIV                  | ****           | <0.0001                 |
| APE 3DIV vs. APE 5DIV                    | ns             | 0.8367                  |
| APE 3DIV vs. APE 7DIV                    | ****           | <0.0001                 |
| Muscarine 3DIV vs. Muscarine 5DIV        | ****           | <0.0001                 |
| Muscarine 3DIV vs. Muscarine 7DIV        | ****           | <0.0001                 |
| Ctrl 5DIV vs. APE 5DIV                   | ****           | <0.0001                 |
| Ctrl 5DIV vs. Muscarine 5DIV             | ****           | <0.0001                 |
| Ctrl 5DIV vs. Ctrl 7DIV                  | ****           | <0.0001                 |
| APE 5DIV vs. APE 7DIV                    | ****           | <0.0001                 |
| Muscarine 5DIV vs. Muscarine 7DIV        | ns             | >0.9999                 |
| Ctrl 7DIV vs. APE 7DIV                   | ****           | <0.0001                 |
| Ctrl 7DIV vs. Muscarine 7DIV             | ns             | 0.985                   |

One-way ANOVA statistical analysis followed by Tukey multiple comparisons post hoc-tests. The results showed a significant increase of cell growth between APE 3 and APE 7 DIV (\*\*\*\*  $p < 0.0001$ ) or Muscarine 3DIV vs 5 and 7 DIV (\*\*\*\*  $p < 0.0001$ ). Although this increase at different days of APE treatment, cell growth between untreated and treated cells at the same time point have shown a decrease of cell growth after M2 agonist exposure.
